# 1 Fully Automated Delineation of the Optic 2 Radiation for Surgical Planning using 3 Clinically Accessible Sequences 4

5 Lee B Reid,<sup>1†</sup> Eloy Martínez-Heras,<sup>2</sup> Jose V Manjón,<sup>3</sup> Rosalind L. Jeffree,<sup>4,5</sup> Hamish Alexander,<sup>4</sup> Julie Trinder,<sup>1</sup>  
6 Elisabeth Solana,<sup>2</sup> Sara Llufrui,<sup>2</sup> Stephen Rose,<sup>1</sup> Marita Prior,<sup>4</sup> Jurgen Fripp<sup>1</sup>

7  
8 † Corresponding Author. Level 5 UQ Health Science Building 901/16, Royal Brisbane and Women's Hospital,  
9 Herston, QLD, 4029, Australia. *Email Address:* [lee.reid1@uqconnect.edu.au](mailto:lee.reid1@uqconnect.edu.au)

10 <sup>1</sup>The Australian e-Health Research Centre, CSIRO, Queensland, Australia

11 <sup>2</sup> Center of Neuroimmunology, Laboratory of Advanced Imaging in Neuroimmunological Diseases (ImaginEM),  
12 Hospital Clinic Barcelona, Institut d'Investigacions Biomediques August Pi i Sunyer (IDIBAPS) and Universitat de  
13 Barcelona, Barcelona, Spain

14 <sup>3</sup> Instituto de Aplicaciones de las Tecnologías de la Información y de las Comunicaciones Avanzadas (ITACA),  
15 Universitat Politècnica de València, Camino de Vera s/n, 46022 Valencia, Spain

16 <sup>4</sup> Royal Brisbane and Women's Hospital, Metro North, Queensland, Australia

17 <sup>5</sup> University of Queensland, School of Clinical Medicine, Herston, Queensland, Australia

18

## 19 1 Abstract

20 Quadrantanopia caused by inadvertent severing of Meyer’s Loop of the optic radiation is a well-recognised  
21 complication of temporal lobectomy for conditions such as epilepsy. Dissection studies indicate that the anterior  
22 extent of Meyer’s Loop varies considerably between individuals. Quantifying this for individual patients is thus  
23 an important step to improve the safety profile of temporal lobectomies. Previous attempts to delineate Meyer’s  
24 Loop using diffusion MRI tractography have had difficulty estimating its full anterior extent, required manual  
25 ROI placement, and/or relied on advanced diffusion sequences that cannot be acquired routinely in most clinics.  
26 Here we present CONSULT – a pipeline that can delineate the optic radiation from raw DICOM data in a  
27 completely automated way via a combination of robust preprocessing, segmentation, and alignment stages, plus  
28 simple improvements that bolster the efficiency and reliability of standard tractography. We tested CONSULT  
29 on 694 scans of predominantly healthy participants (538 unique brains), including both advanced acquisitions  
30 and simpler acquisitions that could be acquired in clinically acceptable timeframes. Delineations completed  
31 without error in 99.4% of the scans. The distance between Meyer’s Loop and the temporal pole closely matched  
32 both averages and ranges reported in dissection studies for all tested sequences. Median scan-rescan error of  
33 this distance was 1mm. When tested on two participants with considerable pathology, delineations were  
34 successful and realistic. Through this, we demonstrate not only how to identify Meyer’s Loop with clinically  
35 accessible sequences, but also that this can be achieved without fundamental changes to tractography  
36 algorithms or complex post-processing methods.

## 37 Keywords

38 Temporal lobectomy, tractography, diffusion magnetic resonance imaging, Meyer’s Loop, optic radiation,  
39 epilepsy

40

## 41 Highlights

- 42 • We propose a fully automated means of delineating the optic radiation using diffusion MRI from DICOM  
43 data
- 44 • Anatomical measurements from tractography of over 500 brains align well with previous dissection  
45 studies
- 46 • The proposed pipeline works well with clinically accessible and advanced acquisitions
- 47 • Median scan-rescan error was 1mm
- 48 • Plausible tractography was generated when pathology was present

49

50

## 51 2 Introduction

52 The axons of the visual pathway emanate from the retina, partially bifurcate at the optic chiasm, pass on either  
53 side of the midbrain, and synapse in the lateral geniculate nucleus (LGN). Subsequent axons emanating from the  
54 LGN form the posterior, central and anterior bundles, referred to collectively as the optic radiation, which  
55 synapse in the primary visual cortex,<sup>1</sup> and potentially V2 and V3.<sup>2</sup> The posterior bundle travels almost directly  
56 posterior from the LGN, whilst the central bundle first travels more laterally, before following a similar path. The  
57 anterior bundle, which carries information from the superior visual quadrant, travels anteriorly, inferiorly, and  
58 laterally as it fans.<sup>1</sup> It then curves around the lateral ventricle to travel posteriorly to the visual cortex. The entire  
59 optic radiation is critical to normal vision, but the anterior bend of the anterior bundle, often referred to as  
60 ‘Meyer’s Loop’, has received ongoing focus in neurosurgical science for two related reasons. Firstly, unlike other  
61 parts of the optic radiation, it is frequently severed during anterior temporal lobectomies and selective  
62 amygdalohippocampectomies, which are common treatments for epilepsy, resulting in permanent  
63 quadrantanopia.<sup>3</sup> Such partial blindness can result in a reduced quality of life and independence, particularly by  
64 removing patients’ legal eligibility to drive.<sup>3,4</sup> Secondly, radiologists can use standard structural images to localise  
65 vision-critical gyri in the occipital lobe and often even posterior aspects of the optic radiation itself (which  
66 appears as a band; Suppl Fig 1). By contrast, the majority of Meyer’s loop is not identifiable on such images.

67 The primarily investigated morphological measurement for the optic radiation has been the distance  
68 between the most anterior point of Meyer’s Loop and the temporal pole (ML-TP distance).<sup>3</sup> This reflects the fact  
69 that temporal lobe resection commonly removes tissue from this zone, and this metric can inform the maximally  
70 appropriate posterior extent of tissue excision. Six influential cadaver dissection studies have suggested that this  
71 distance varies considerably between patients, ranging between 15 – 34mm.<sup>1,5-9</sup> The reported average distances  
72 have been 25mm (n=20),<sup>6</sup> 26mm (n=11),<sup>8</sup> and 27mm (n=25),<sup>5</sup> 28.4mm (n=20), and 31.4mm (n=10),<sup>7</sup> giving a  
73 weighted mean of 27.2mm. It is important to remember that it is difficult to delineate the precise anatomical  
74 boundaries via the Klinger dissection technique used in these studies, meaning that some of these estimates  
75 could be slightly overestimated.<sup>5</sup> Regardless, the range of distances reported implies that measurement of an  
76 individual surgical candidate’s ML-TP distance is more prudent than relying on population averages.

77 To achieve maximal clinical utility, a tool that delineates the optic radiation needs to be non-invasive,  
78 accurate, reliable, and not require costly resources such as manual input, training, or special hardware. Given its  
79 non-invasive nature, diffusion MRI tractography is an obvious option, and several groups have delineated the  
80 optic radiation using this technique.<sup>2,10-22</sup> Notably, Chamberland et al.<sup>10</sup> presented an imaging method that  
81 produced arguably the most realistic range of ML-TP distances to date. The success of this method, however,  
82 relied on manual ROI placement and a multishell sequence with b-values up to 5000 s/mm<sup>2</sup>, potentially impeding  
83 widespread clinical adoption. Such clinical-accessibility issues have proven difficult to overcome: to the authors’  
84 knowledge, all published methods to date have required manual input (e.g. region-of-interest [ROI] placement  
85 and adjustment, skull stripping or other preprocessing) from trained technicians, and/or advanced MR  
86 sequences that rely on MRI hardware or multiband packages that are often unavailable clinically.

87           Beyond clinical accessibility, perhaps the largest challenge has proven to be achieving reasonable  
88 accuracy and reliability in optic radiation delineations. As noted by Chamberland, almost all published works  
89 reporting ML-TP distances, regardless as to their automaticity or acquisitions, have tended to at least somewhat  
90 underestimate the anterior extent of Meyer’s Loop (i.e. overestimate ML-TP distances).<sup>10,21</sup> For example,  
91 Kammen et al<sup>23</sup> described a sophisticated pipeline that automated all but image preprocessing, alignment, and  
92 skull-stripping steps. When applied to diffusion images that would take over an hour to acquire on a typical  
93 hospital scanner, this produced visibly convincing tractography but a mean ML-TP distance around 4mm greater  
94 than most dissection studies. Such difficulties have raised the question as to whether well-established  
95 tractogram generating algorithms are simply incapable of reliably delineating the optic radiation’s complex  
96 morphology. A number of groups have improved optic radiation delineations through fundamental changes in  
97 the way tractography is interpreted, performed, or filtered after generation.<sup>16–18,21,23</sup> However, it is not settled  
98 as to whether such purpose-designed algorithms are fundamentally required for optic radiation delineation, or  
99 whether standard tractography could be capable of this task if confounding issues were resolved, such as being  
100 able to reliably delineate the typically invisible boundaries of the LGN.<sup>17</sup>

101           Herein, we describe an image processing pipeline central to our Connectivity Based Neurosurgical  
102 Planning Toolkit (CONSULT), which automatically processes images from their raw form and produces a binary  
103 map of the optic radiation suitable for surgical planning. For the clinical reasons discussed earlier, the focus of  
104 this pipeline, and its assessment here, is an accurate estimation of the ML-TP distance. CONSULT’s primary  
105 strength is that it is highly clinically accessible: it processes data from a range of sequences in their raw (DICOM)  
106 form, without requiring any human input, and produces ML-TP distances closely in line with historical dissection  
107 studies. We describe its stages and report ML-TP distances and reproducibility for a large sample of  
108 predominantly neurologically normal participants. Through this, we demonstrate that adequate estimates of  
109 ML-TP distance for surgical planning can be achieved without manual input or specialised sequences that require  
110 specialised scanner capabilities and impractical scan times.

## 111   3   Methods

112   We processed several datasets using the CONSULT pipeline, measuring the ML-TP distance in 538 unique brains.  
113   Within this pipeline are a small number of changes made to MRtrix3 that are designed to improve the efficiency  
114   of streamline generation but do not alter the underlying principles of the probabilistic tractography algorithm  
115   itself. We now describe the data processed, the changes made to MRtrix3, then the pipeline itself.

### 116   3.1   Data Processed

117   Table 1 details the scans processed, grouped into 6 datasets. The three largest datasets were participants from  
118   the Human Connectome Project (HCP),<sup>24,25</sup> whilst three more were data acquired on scanners in clinical facilities.  
119   Approval was granted for data collection and acquisition from the relevant ethics committees in Metro North  
120   Australia, Hospital Clínic de Barcelona, Washington University, and CSIRO. All participants gave written informed  
121   consent. Scan times listed below assume full-brain coverage, but approximately half this many slices is enough  
122   to image the optic radiation.

123 To assess the ML-TP distance in many participants, we processed the first 500 participants from the  
124 HCP Young Adults 1200 release (99% aged 22 – 35y, 40% male). This dataset is named within as ‘HCP Multishell-  
125 90’ (HCP-M90). Due to the large number of scans, preprocessed images were used due to reduce the  
126 computational cost to an achievable level.

127 To assess the reproducibility of CONSULT pipeline on high quality *raw* data, the ‘HCP Multishell 60  
128 Repeat’ (HCP-M60) dataset was used. This consisted of 40 participants (28% male, aged 22 – 35y) from the Young  
129 Adults Release that were acquired at two time points. We processed both time points from raw diffusion data,  
130 but discarded all but 60 volumes per shell prior to preprocessing (see Table 1). Directions were removed by  
131 selecting sub-shells that each had an approximately evenly distributed set of directions using a freely available  
132 script ([https://bitbucket.csiro.au/projects/CONSULT/repos/dwi\\_tools/](https://bitbucket.csiro.au/projects/CONSULT/repos/dwi_tools/)). An equivalent sequence for a Siemens  
133 Prisma scanner equipped with multiband would carry an acquisition time of approximately 38 minutes.

134 The ‘HCP Single Shell’ (HCP-S) dataset was processed to assess the reproducibility and performance of  
135 the CONSULT pipeline with a lower quality dataset. This dataset consisted of the same participant data as the  
136 HCP-M60 dataset, but prior to preprocessing, we removed all but 2 x b=0 volumes and 60 x b=3000 s/mm<sup>2</sup>  
137 volumes using the aforementioned script and downsampled this raw diffusion data to 2mm isotropic. An  
138 equivalent sequence can be acquired in ~12 minutes on a Siemens Prisma scanner without multiband (~6  
139 minutes with multiband factor of 2).

140 We also sought to determine CONSULT pipeline’s performance on raw data acquired at clinical sites in  
141 clinically acceptable timeframes. The ‘Hospital-A’ dataset consisted of three-shell images from 19 neurologically  
142 healthy participants aged 21 – 45y (mean: 33.7y), and is regularly acquired at Hospital Clínic, Barcelona. Scan  
143 time for diffusion images and the associated field map was 20 minutes using multiband. The Hospital-B dataset  
144 consisted of three-shell images of five adult neurosurgical candidates (two with temporal lobe epilepsy, two  
145 with low grade gliomas, one with an arteriovenous malformation) acquired at the Royal Brisbane and Women’s  
146 Hospital campus, using a sequence that is regularly acquired at several Australian hospitals as part of clinical  
147 research (TA: 11.5 minutes with multiband, 23 minutes without). Results for Hospital-B were assessed  
148 qualitatively as genuine deviations from normal morphology could be expected in several cases. Finally, the  
149 Hospital-C dataset consisted of a low-resolution two-shell scan of two healthy adults acquired on a Siemens  
150 Biograph mMR scanner located on the Royal Brisbane and Women’s Hospital Campus (TA: ~17 minutes without  
151 multiband).

152

Table 1. Input image properties for the datasets used, ordered by number of diffusion directions. Changes were made to HCP data to produce the ‘HCP Multishell 60’ (HCP-M60) and ‘HCP Single Shell’ (HCP-S) datasets. ‘Preprocessed’ indicates that preprocessed images were used rather than raw images. Direction Repeats indicates whether any measurement repeats of each diffusion-weighted gradient direction were included in the data. Shell b-values are in s/mm<sup>2</sup>. ‘Acceptable TA’ indicates whether the sequence could be acquired in a clinically acceptable timeframe. The HCP Connectome Skyra is a modified Siemens Skyra scanner with differing performance to the commercially available Skyra model. †Acceptable TA using a Prisma or Vida scanner, or using multiband, or with partial brain coverage. Abbreviations: HCP, Human Connectome Project; HCP-M, Human Connectome Project multishell; ML-TP, Meyer’s-Loop to Temporal Pole distance; Preproc, minimally preprocessed data; Rev-P, reverse-phase encoding; TA, acquisition time.

| Name       | Purpose                                                                                       | Scanner                        | Participant count | Time points | Coil Channels | Data Used | Resolution | Diffusion                   |        |        |        | Direction Repeats | Distortion Correction | Acceptable TA           | T1 MPRAGE |            |
|------------|-----------------------------------------------------------------------------------------------|--------------------------------|-------------------|-------------|---------------|-----------|------------|-----------------------------|--------|--------|--------|-------------------|-----------------------|-------------------------|-----------|------------|
|            |                                                                                               |                                |                   |             |               |           |            | Unique Directions per Shell |        |        |        |                   |                       |                         | Data Used | Resolution |
|            |                                                                                               |                                |                   |             |               |           |            | b=0                         | b=1000 | b=2000 | b=3000 |                   |                       |                         |           |            |
| HCP-M90    | ML-TP against prior dissection studies in very high-quality data                              | Connectome Skyra               | 500               | 1           | 32            | Preproc.  | 1.25mm     | 18                          | 90     | 90     | 90     | Included          | Rev-P                 | No                      | Preproc.  | 1mm        |
| HCP-M60    | ML-TP reproducibility in high quality data                                                    | Connectome Skyra               | 40                | 2           | 32            | Raw       | 1.25mm     | 12                          | 60     | 60     | 60     | Removed           | Rev-P                 | No                      | Preproc.  | 1mm        |
| Hospital-A | ML-TP against prior dissection studies in high quality raw data                               | Siemens Prisma (Barcelona)     | 19                | 1           | 64            | Raw       | 1.5mm      | 5                           | 30     | 60     | 90     | Not Acquired      | Fieldmap              | With Prisma & Multiband | Raw       | 0.9mm      |
| Hospital-B | Qualitative assessment in presurgical patients collected in a clinically acceptable timeframe | Siemens Prisma (Brisbane)      | 5                 | 1           | 64            | Raw       | 2mm        | 12                          | 20     | 32     | 60     | Not Acquired      | Rev-P                 | Yes†                    | Raw       | 1mm        |
| Hospital-C | Demonstration using hardware and sequences without multiband                                  | Siemens Biograph mMR (PET/MRI) | 2                 | 1           | 8             | Raw       | 2.5mm      | 12                          | 20     | 0      | 60     | Not Acquired      | Rev-P                 | Yes                     | Raw       | 1mm        |
| HCP-S      | ML-TP reproducibility and population norms in lower quality data                              | Connectome Skyra               | 40                | 2           | 32            | Raw       | 2mm        | 2                           | 0      | 0      | 60     | Removed           | Rev-P                 | Yes                     | Preproc.  | 1mm        |

## 153 3.2 Computationally Efficient Tractography

154 Seeding naively from near the LGN can convincingly generate the anterior bundle but only if left running for a  
155 very long time, as streamlines are far more likely to follow the central and posterior bundles, or aberrant paths,  
156 than successfully complete Meyer's Loop. Although constraints may eliminate erroneous streamlines,  
157 tractography's processing time remains prohibitive because such constraints rarely prevent most computational  
158 time being spent generating streamlines that are ultimately rejected, falsely giving the impression that  
159 delineating such complex anatomy is beyond the capabilities of existing tractography algorithms. We have  
160 forked MRtrix3<sup>26</sup> and added three features that can improve efficiency but do not alter the nature of  
161 tractography itself. Source code for this forked version can be found at  
162 <https://bitbucket.csiro.au/projects/CONSULT/repos/mrtrix3/>. For brevity, detailed reasoning for these features  
163 can be found in Supplementary Materials.

164 Firstly, we propose a method by which seeding directions can be set in a voxel-wise manner from a  
165 unipolar dixel image (I.E. where each voxel contains a histogram of unipolar-direction probabilities) and converts  
166 pre-existing tractography to such images. This theoretically allows selective use of voxelwise seeding directions  
167 that are expected to be fruitful in generating a tractogram, including in a way previously demonstrated by mesh-  
168 based seeding.<sup>27</sup>

169 Secondly, we have added an option to tckgen that ensures that streamlines pass through inclusion  
170 regions in the correct order; this feature has also been pulled into the official distribution of MRtrix.

171 Anatomically constrained tractography, an established method, can rewind streamlines when they  
172 terminate unsatisfactorily, allowing a re-attempt at completing.<sup>28</sup> We have enabled 'back-tracking' within MRtrix  
173 for more general use by allowing this to run outside of anatomically constrained tractography, and requiring  
174 rewinding to explicitly defined ROIs that can be placed before problematic branch points. Here, we  
175 conservatively set the maximum number of back-track attempts at two per streamline.

## 176 3.3 Structural Processing

### 177 3.3.1 Template Generation

178 Before processing, we created population probability images for labelling of the temporal lobe and V1/V2 region  
179 by affine registering 138 HCP 'Young Adult' participants to MNI space.<sup>29</sup> Freesurfer-defined labels from these  
180 datasets were transformed into MNI space, and their mean taken to represent population probabilities for the  
181 temporal lobe and V1/V2 zones. Of these 138 scans, 54 participants also belonged to the HCP-M90 dataset. No  
182 participants within HCP-M60, HCP-S, or Hospital datasets contributed to such atlas creation.

### 183 3.3.2 Basic Processing

184 For all Hospital datasets, raw T1 scans were N4 bias corrected<sup>30</sup> and skull stripped using HD-BET.<sup>31</sup> Global  
185 Approximate Block Matching was used to denoise and reduce any motion artefacts, as well as segment these  
186 images into grey matter, white matter, and cerebrospinal fluid.<sup>32,33</sup> A non-linear transform from MNI space was  
187 also calculated using ANTs SyN<sup>34</sup> using a multi-atlas method.

188 Due to the unusual bias-correction requirements for HCP structural data,<sup>25</sup> minimally preprocessed T1  
189 data were used for all HCP datasets. To reduce computational overhead these scans were resampled to 1mm

190 isotropic. These data were then processed identically to the hospital datasets, excepting that bias-correction  
191 was not (re-)performed. No masks, registrations, or parcellations provided with the HCP data were used for  
192 either the structural or diffusion data, except for generation of population templates (see above).

## 193 3.4 Diffusion Processing

### 194 3.4.1 Preprocessing

195 The HCP-M90 dataset was used in its minimally preprocessed form to ensure an achievable computational cost  
196 given the large numbers of scans processed. This preprocessing included correction for b0 intensity  
197 inhomogeneities, EPI distortion, eddy currents, head motion, gradient non-linearities, as well as reorientation  
198 and resampling to 1.25mm isotropic.<sup>25</sup>

199 Data from all datasets except HCP-M90 were preprocessed by CONSULT from their raw form as follows.  
200 Images were denoised using MRtrix's dwidenoise, and motion-affected volumes were removed using a  
201 previously described method.<sup>35</sup> If a fieldmap was detected (here, only the Hospital-A dataset), a brainmask was  
202 calculated from the magnitude phase image using bet2<sup>36</sup> as this is more robust to signal dropout in the temporal  
203 lobe, and a fieldmap calculated using fsl\_prepare\_fieldmap. Alternatively, for reverse-phase encoded scans (all  
204 but the Hospital-A dataset), an initial brainmask was calculated using MRtrix's dwi2mask, but dilated to ensure  
205 full temporal-lobe coverage, and spatial distortions were calculated using FSL's topup  
206 (<http://fsl.fmrib.ox.ac.uk/fsl/fslwiki/TOPUP>). For all datasets motion, distortion, and eddy-current correction  
207 were performed through eddy\_cuda 8.0. Intensity inhomogeneities were also corrected using N4 bias  
208 correction, the field being estimated from the eddy-corrected mean b0 image. For reverse-phase encoded scans,  
209 a final brainmask was then recalculated using dwi2mask and dilation operations.

### 210 3.4.2 Processing

211 After preprocessing, all datasets were processed identically, unless otherwise stated. Tissue response functions  
212 were calculated using the Dhollander algorithm.<sup>37</sup> Fibre orientation dispersion maps were calculated for white  
213 matter, grey matter, and cerebrospinal fluid using multishell multitissue constrained spherical deconvolution  
214 (multishell data) or Single-Shell 3-Tissue constrained spherical deconvolution (HCP-S dataset;  
215 <https://3Tissue.github.io>). Fractional anisotropy was calculated using MRtrix3, upsampled by a factor of 2 using  
216 sync interpolation, and cropped to the final brainmask.

217 Several ROIs, defined in MNI space, were needed for tractography (see below). To transform these into  
218 native diffusion space, a transform from diffusion to MNI space was calculated: the fractional anisotropy image  
219 was rigid registered to the participant's T1 image using ANTs and combined with the previously-calculated non-  
220 rigid transform from T1 space to MNI space.

## 221 3.5 Posterior Bundle

222 To aid identification of the anterior bundle, the posterior bundle, and a partial central bundle, were delineated  
223 by tracking unidirectionally from the optic tract to V1/V2. Streamlines were generated until Tractogram  
224 Bootstrapping<sup>38</sup> stability criteria were met (min Dice, 0.95; reliability, 0.95; resolution equal to diffusion spatial  
225 resolution;  $b_{int}$ ,  $0.001 \times n$ ; minimum streamline count, 10000). The V1/V2 region was calculated by transforming  
226 the previously described V1/V2 template from MNI into native diffusion space, multiplying by individual



227 participant's grey-matter probability image taken from the FOD maps, thresholding and binarising. Exclusion  
228 masks included the grey-matter segmentation (excepting in primary visual areas) and a mask defined in MNI  
229 space similar to that described by Martinez-Heras et al.<sup>15</sup>

230 We seeded from the optic tract near the midbrain, which was identified using a convolutional neural  
231 network, as we found seeding from the optic chiasm<sup>23</sup> was sometimes impaired by MR artefacts. Details of this  
232 network are supplied in Supplementary Materials. In brief, the T1 and white matter fibre orientation dispersion  
233 images were transformed into MNI space and cropped to a stack of six 1mm-thick axial patches in the centre of  
234 the brain. These were provided to this network, which had a UNet-style architecture<sup>39</sup> and had been trained  
235 with datasets for which the optic tract had been identified using tractography seeded from the optic chiasm.  
236 The output was a binary mask of the optic tract as it entered the cerebral hemispheres, which could then be  
237 padded and transformed back into native participant space (Suppl Fig 3).

## 238 3.6 Central and Anterior Bundles

239 The remaining partial-central and anterior bundles were delineated by tracking from the LGN to the visual  
240 cortex. This was performed in a two-pass procedure. In both instances, exclusion ROIs were those previously  
241 described.

### 242 3.6.1 First Pass: Identifying an Efficient Seed Point

243 The first pass was designed solely to identify a seeding position and direction near the LGN, for efficient  
244 delineation of the anterior bundle during the second pass. A seeding region was calculated by binarising  
245 tractography of the posterior bundle (Figure 1A-B), multiplying by an ROI slightly anterior to the LGN  
246 (transformed from MNI space; Figure 2, top) and dilating once (Figure 1C). This mask was slightly anterior to the  
247 true LGN because directly seeding from the LGN can meaningfully slow streamline generation. Tractography was  
248 then seeded from this ROI (Figure 1D), the streamline count being set automatically by Tractogram  
249 Bootstrapping<sup>38</sup> for a reproducible map of streamline directions (i.e. unipolar-dixel trackmap; default settings  
250 used and minimum streamline count of 1000). Three ordered inclusion regions were used: the seed ROI, the  
251 temporal lobe posterior and medial to the expected tip of the anterior bundle (Figure 2, middle), and a pre-  
252 occipital plane (Figure 2, bottom). To improve efficiency, the second inclusion region was used as a back-tracking  
253 ROI. This back-tracking ROI allowed streamlines that entered the second inclusion region but were ultimately  
254 rejected to be rewound to approximately 44mm posterior to the temporal lobe and reattempt completion (up  
255 to twice per streamline).

### 256 3.6.2 Second Pass: Tracking the Full Bundle

257 The tractogram generated by the first pass was converted into a unipolar dixel image in which each voxel  
258 represented a histogram of seeding directions that were successful in delineating Meyer's loop (Figure 1E). The  
259 first-pass tractogram was then discarded. Streamline generation was seeded from the same ROI as the first pass,  
260 but with initial seeding directions sampled from this dixel map. Four ordered inclusion ROIs were used: the same  
261 three as the first pass, followed by the visual cortex ROI previously described. Streamlines were generated until  
262 Tractogram Bootstrapping<sup>38</sup> stability criteria were met for a binary track map (min Dice, 0.95; reliability, 0.95;  
263 spatial resolution double that of the diffusion MR;  $b_{int}$ ,  $0.001 \times n$ ; minimum streamline count, 10000). The final

264 tractogram was converted into a track density image, thresholded at  $0.001 \times$  number of streamlines generated  
265 and binarised, in line with the Tractogram Bootstrapping criteria.

### 266 3.7 Morphological Measurement

267 To enable fair comparisons between datasets in terms of brain volume, binarised tractograms were warped into  
268 MNI space<sup>29</sup> for morphological measurements. We defined the 'normalised ML-TP distance' (nML-TP) as the  
269 anterior distance between the most anterior voxel of the temporal lobe ( $y = 25\text{mm}$ ) and the most anterior voxel  
270 of the anterior bundle, in MNI space.

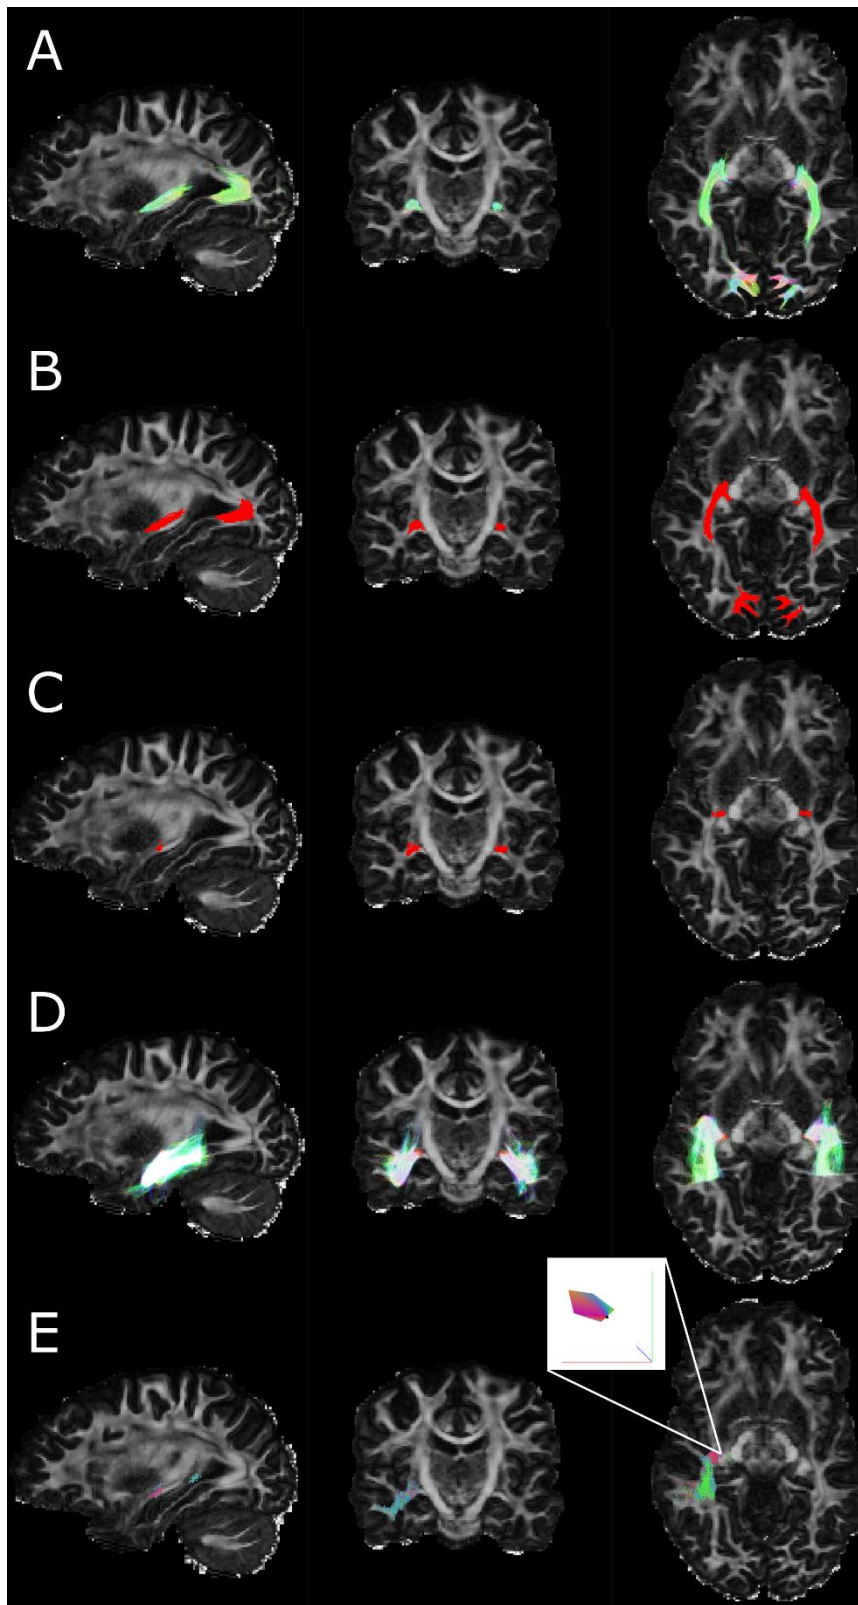

271

272 *Figure 1. Steps related to the first pass generation of streamlines describing anterior and middle bundles. Tractography of the*  
273 *posterior bundle (A) was converted into a binary ROI (B), then masked to an ROI slightly anterior to the LGN (C). Tractography*  
274 *was then performed (D) and converted into a map of streamline directions (E). The inset in E shows a zoomed view of a single*  
275 *voxel containing a histogram of streamline directions (unipolar dixel). This dixel map was used to improve efficiency of the*  
276 *seeding operation for the second pass of tractography (see Results for examples). Note that tractography is displayed cropped*  
277 *to the shown slices.*

278

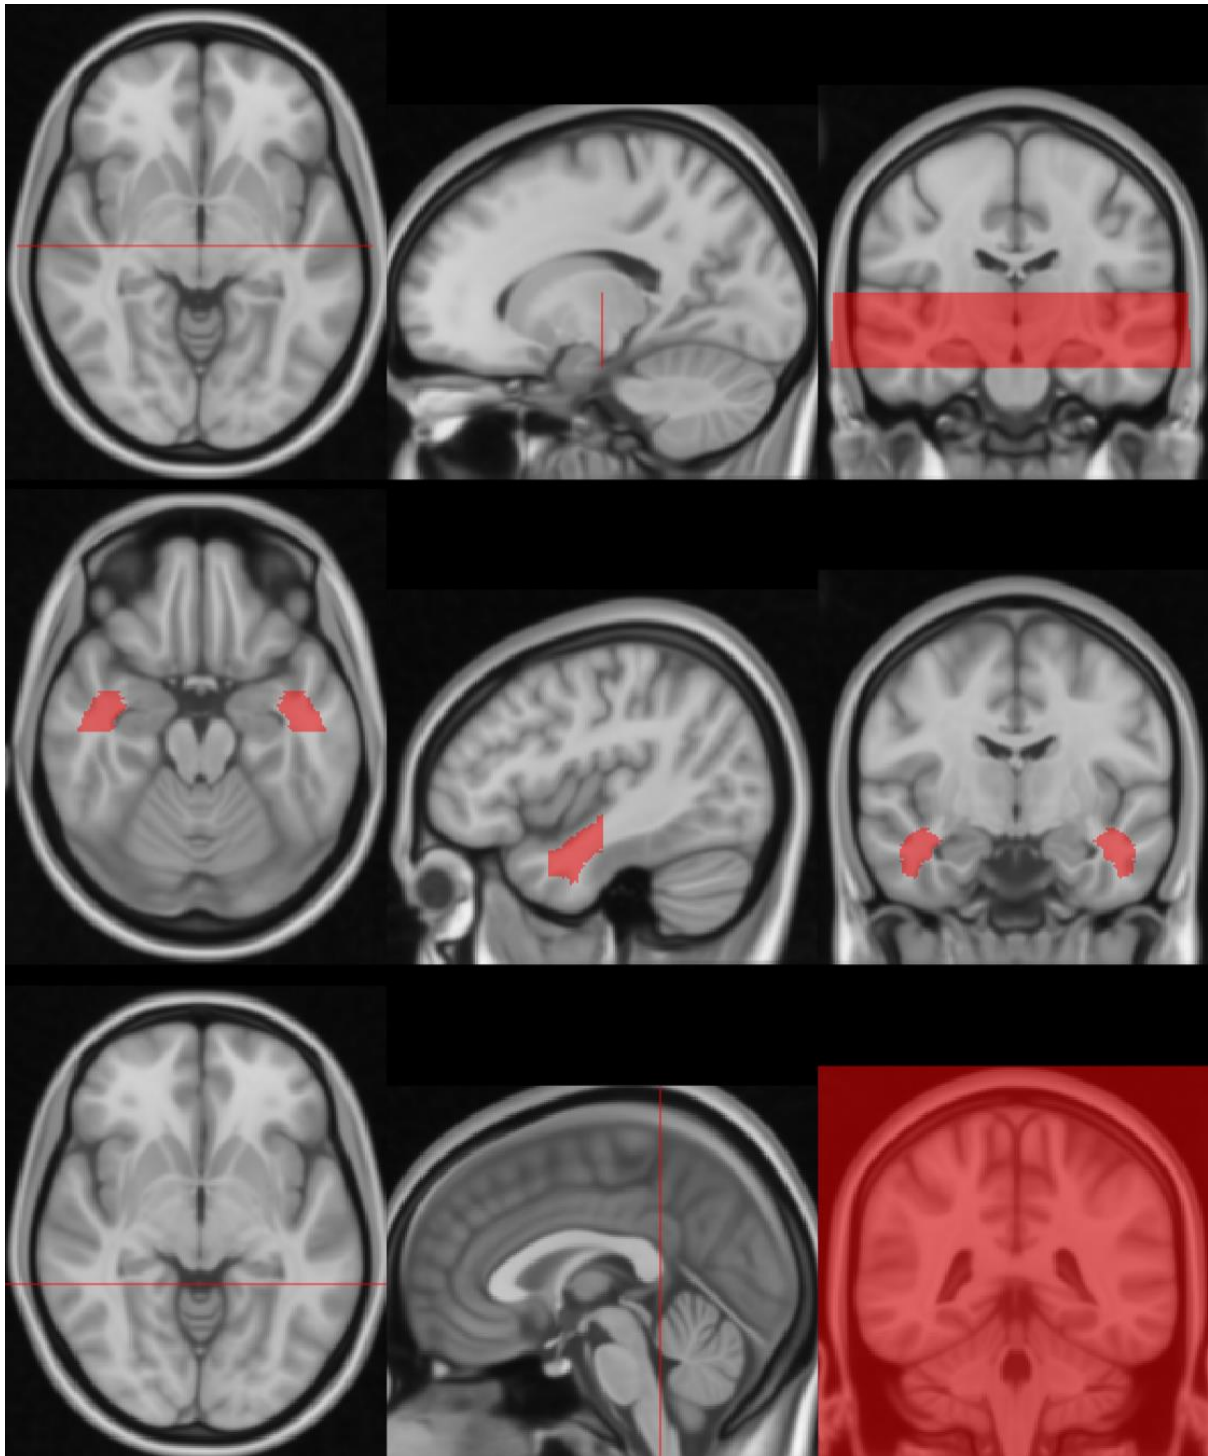

279

280 *Figure 2. Ordered inclusion regions for the anterior bundle, as defined on the non-linear MNI152 template. Streamlines must*  
281 *pass through these in the order displayed here (from top to bottom). Top: the approximate pre-LGN plane, also used for*  
282 *generating the seed. Middle: the temporal lobe inclusion and backtrack region. Bottom: the pre-occipital plane. The fourth*  
283 *inclusion region was the visual cortex, which was generated more dynamically by combining a population average with the*  
284 *participant's tissue segmentation (see text), and so is not displayed here.*

285

## 286 4 Results

### 287 4.1 Success Rates and Normative Statistics from the HCP

288 Typical per-scan processing times for 2mm multishell datasets were 3 – 4 hours on a 20 x 2.6Ghz core GPU-  
289 enabled machine, the majority of which was spent on diffusion preprocessing and registration steps. As data  
290 were processed on a network drive better performance can be expected on a dedicated machine. Data  
291 processing failed in 3 of 694 datasets (Table 2). Two failures were in HCP-M90 datasets: one due to a failed  
292 registration between the T1 and fractional anisotropy image, and another due to failed skull stripping in a  
293 participant displaying presumed cutis verticis gyrata. The third failure was an HCP-S dataset for which data  
294 processing completed but the nML-TP distance for one hemisphere was implausible (39 mm); this dataset was  
295 still included in all statistical analyses. Qualitatively, tractography aligned well with expected anatomy. The  
296 middle and posterior sections of the optic radiation aligned well with the corresponding band visible on T1  
297 images, though its likely lateral extent was often slightly overestimated for acquisitions with spatial resolution >  
298 1.5 mm (Suppl Fig 4). Normalised ML-TP distances are summarised in Table 2. The HCP-M90 dataset showed a  
299 median of 27mm and range (14mm – 33mm) in line with historical dissection studies.<sup>7</sup> Despite this wide range,  
300 the interquartile range was tight (25 – 28mm) and 91% of measurements were within 4mm of the median.  
301 Median nML-TP distances did not differ between men and women.

302 Meyer's loop typically extended marginally more anterior on the left side than the right (median nML-  
303 TP distance difference 1mm;  $p < 0.001$ , one-sample Wilcoxon signed-rank test; Figure 6, middle). Such asymmetry  
304 did not differ in left-handed versus right-handed participants (Edinburgh Handedness Inventory score,  $< -0.2$  vs  
305  $> 0.2$ ; medians both 1mm).

### 306 4.2 Reproducibility and Dataset Comparison

307 Healthy datasets showed visibly similar results to one another (Figure 3, Figure 4), as well as numerically similar  
308 medians and interquartile ranges for nML-TP distance (Table 2; Figure 6, top). When restricted to identical  
309 participants ( $n=28$ ), median nML-TP distances matched for HCP-M60 and HCP-M90 (both 26mm;  $p = 0.48$ ,  
310 Wilcoxon Signed Rank Test), but HCP-S showed a greater median nML-TP distance than HCP-M90 (28 vs 26mm;  
311  $p < 0.001$ , Wilcoxon Signed Rank statistic). Hospital-A's median nML-TP distance was marginally greater than that  
312 of HCP-M90 (28mm vs 27mm;  $p < 0.001$ , Mann-Whitney U Test). For the two Hospital-B scans showing gliomas,  
313 CONSULT was able to delineate plausible axonal pathways affected by nearby oedema (Figure 5) and produce  
314 nML-TP distances within the normal range for the contralesional hemisphere. Similarly, delineations were  
315 numerically and visually normal for both hemispheres of the remaining Hospital-B patients, and two healthy  
316 participants in Hospital-C. Despite producing similar anterior extents, lower resolution sequences typically  
317 resulted in physically-broader delineations than higher resolution sequences (Table 2).

318 For the HCP-S and HCP-M60 datasets, we processed both scans of each participant that were available.  
319 Median absolute scan-rescan error in nML-TP measurements were 1mm for both datasets (Figure 6, bottom;  
320  $p=0.15$  Wilcoxon Signed Rank Test).

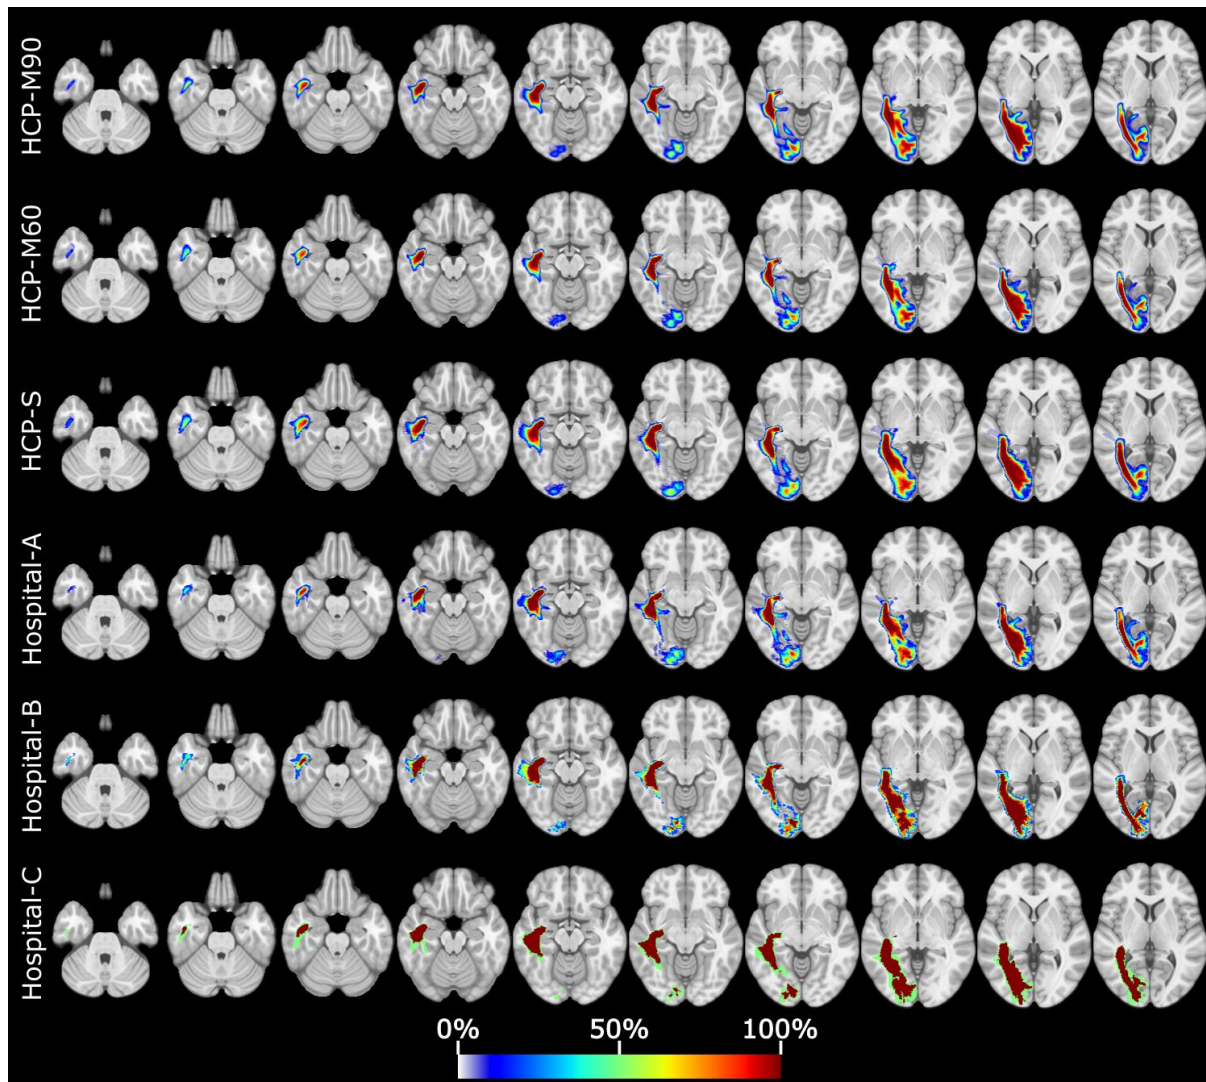

Figure 3. The right anterior bundle for all participants, pooled by dataset into rows, warped into MNI-152 space. Colour indicates the percentage of participants with binarised tractography in that location. Mean morphology is largely the same between all datasets. Hospital-C's simple colouration is because this dataset only comprised two participants.

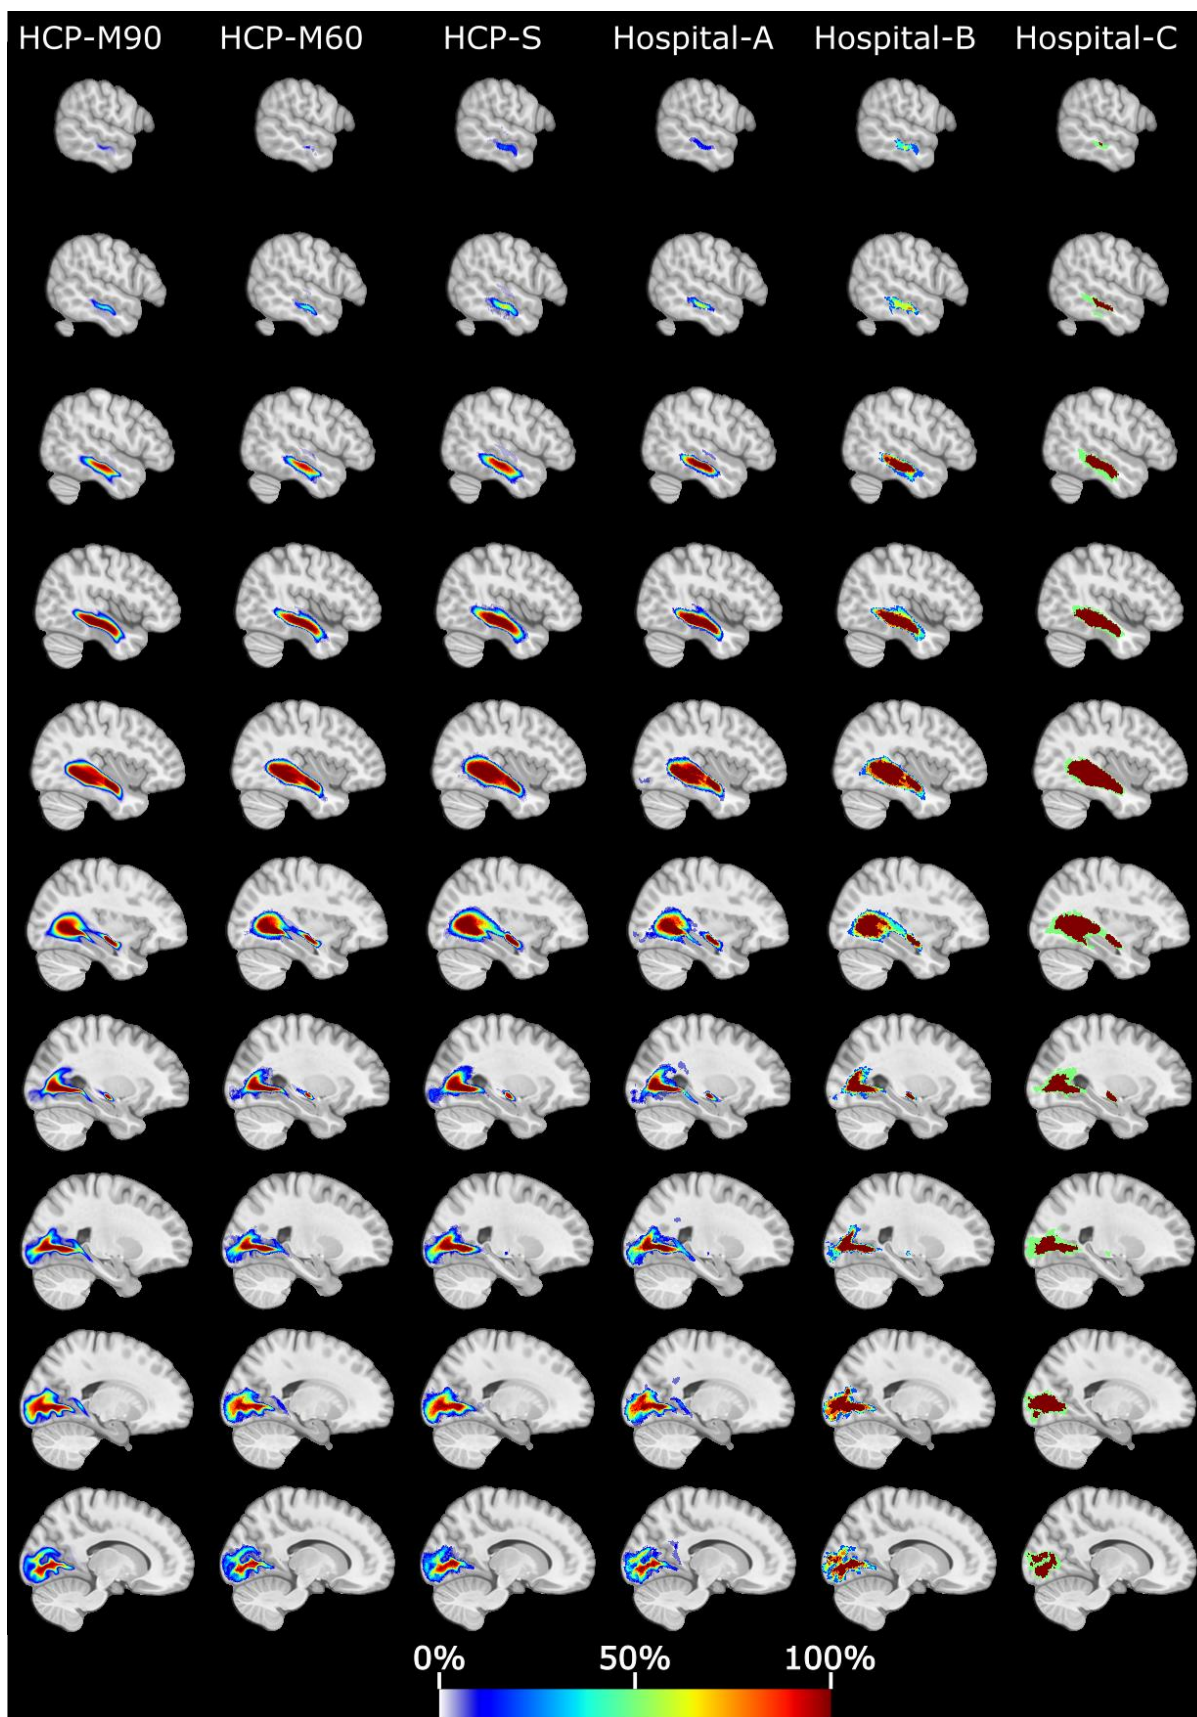

325

326 *Figure 4. The right anterior bundle for all participants, pooled by dataset into columns, warped into MNI-152 space. Colour*  
327 *indicates the percentage of participants with binarised tractography in that location. Mean morphology is largely the same*  
328 *between all datasets. Hospital-C's simple colouration is because this dataset only comprised two participants.*

329

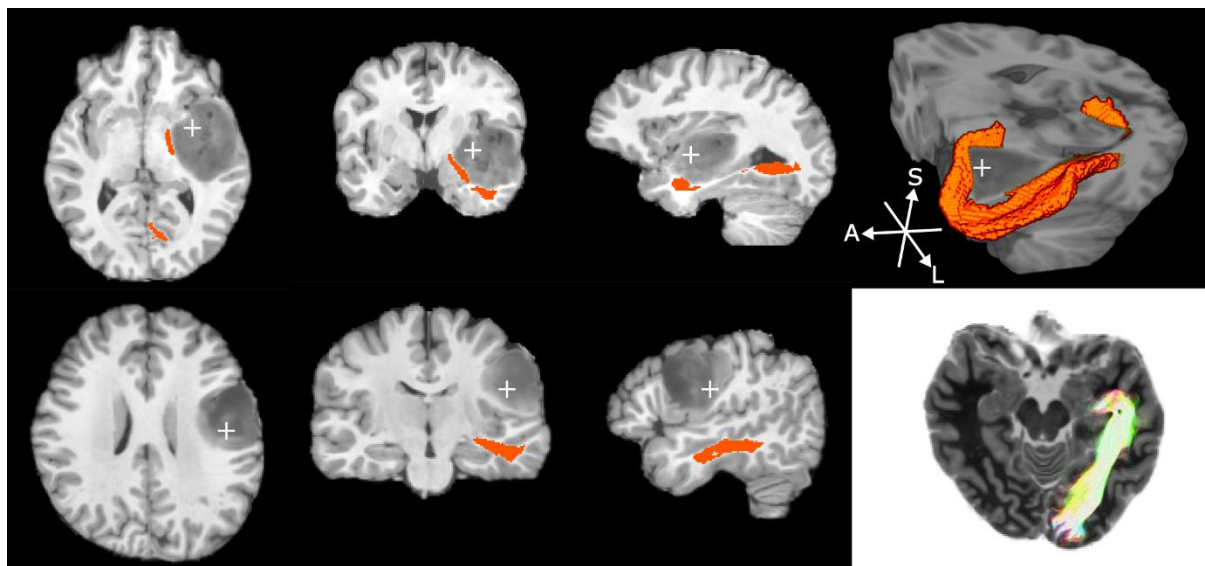

330

331 *Figure 5. Pathology for two participants with gliomas in the Hospital-B dataset, shown on T1 MPRAGE scans. Colour indicates*  
332 *the delineated anterior bundle on the ipsilesional side. Top row: a neurosurgical candidate with pathology in the temporal*  
333 *lobe. The 3D cut-away image (right) shows the delineated Meyer's Loop circling the region of oedema. Bottom row: a*  
334 *neurosurgical candidate with pathology to the frontal lobe causing some geometric distortion of the temporal lobe. The far-*  
335 *right image on this row is an axial slice with streamlines from all slices visible, and image intensities inverted to ease*  
336 *visualisation.*

337



Table 2. Normalised Meyer's Loop to Temporal Pole Distances (nML-TP) and Data Failure Rates For Each Dataset. The 50% percentile refers to the median value. 'Both' hemispheres indicates that both hemispheres' statistics have been pooled. HCP-M60 and HCP-S datasets show values for the first timepoint only. Spatial resolution is displayed in mm and volume in mL.

| Dataset    | Hemisphere     | Resolution | No Datasets Processed | Processing Failed | nML-TP (mm) Percentile |      |      |      |      |      |      | Median Anterior + Central Bundle Volume (mL) |
|------------|----------------|------------|-----------------------|-------------------|------------------------|------|------|------|------|------|------|----------------------------------------------|
|            |                |            |                       |                   | Min                    | 5%   | 25%  | 50%  | 75%  | 95%  | Max  |                                              |
| HCP-M90    | Both           | 1.25       | 500                   | 3 (0.6%)          | 14.0                   | 21.0 | 25.0 | 27.0 | 28.0 | 30.0 | 33.0 | 21.0                                         |
| HCP-M60    | Both           | 1.25       | 40                    | 0 (0%)            | 19.0                   | 21.0 | 25.0 | 26.0 | 28.0 | 29.0 | 31.0 | 20.0                                         |
| Hospital-A | Both           | 1.5        | 19                    | 0 (0%)            | 24.0                   | 25.0 | 27.0 | 28.0 | 29.0 | 30.0 | 30.0 | 24.1                                         |
| Hospital-B | Ipsilesional   | 2          | 5                     | 0 (0%)            | 22.0                   | 22.6 | 25.0 | 27.0 | 28.0 | 29.6 | 30.0 | 30.0                                         |
|            | Contralesional | 2          | 5                     | 0 (0%)            | 25.0                   | 25.2 | 26.0 | 27.0 | 28.0 | 28.8 | 29.0 | 30.2                                         |
| Hospital-C | Both           | 2.5        | 2                     | 0 (0%)            | 26.0                   | N/A  | 26.8 | 27.5 | 28.5 | N/A  | 30.0 | 32.7                                         |
| HCP-S      | Both           | 2          | 40                    | 1 (2.3%)          | 20.0                   | 23.0 | 26.0 | 28.0 | 29.0 | 31.0 | 39.0 | 25.0                                         |

338

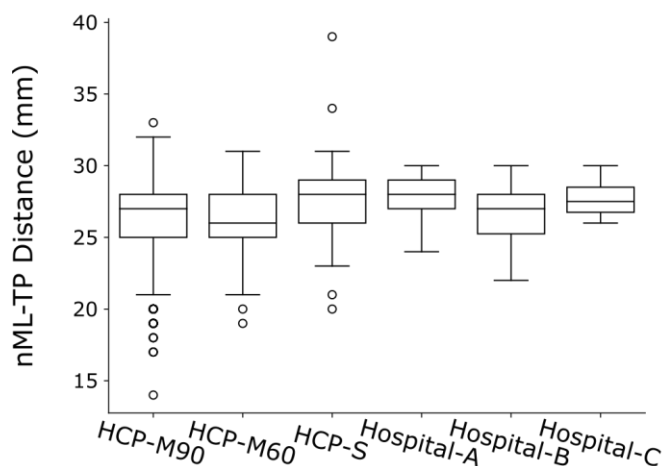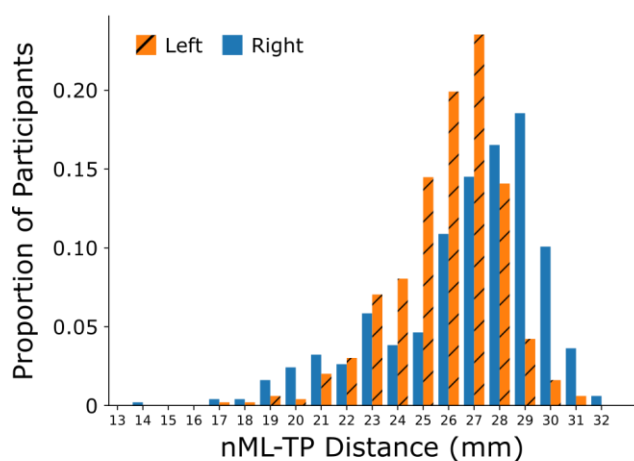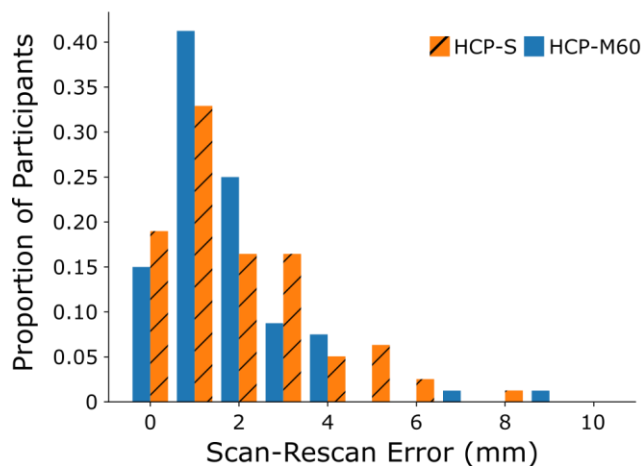

339

340 *Figure 6. Top: Normalised Meyer's Loop to temporal pole (nML-TP) distances for all processed datasets. Measurements are*  
 341 *pooled from both hemispheres. Sequence details can be found in Table 1. Middle: nML-TP distances for the left and right*  
 342 *hemispheres from the HCP-M90 dataset. Bottom: Absolute Scan-Rescan error for the HCP-S and HCP-M60. Note that more*  
 343 *than 50% of scans showed error below the resolution of the raw images (2mm for HCP-S, 1.25mm for HCP-M60).*

## 344 5 Discussion

345 We have demonstrated a pipeline primarily designed to delineate Meyer's Loop, which is often inadvertently  
346 severed during brain surgery. CONSULT distinguishes itself from previously published works particularly in its  
347 ability to process raw data in a fully automated way. Here, CONSULT achieved nML-TP distances for a range of  
348 acquisitions (medians of 26 – 28mm) very similar to average distances reported in four of five dissections studies  
349 reporting this distance (25 – 28.4mm)<sup>5,6,8,9</sup> and similar range (14 – 33mm, plus one failure at 39mm) to all five of  
350 such dissection studies (15 – 34mm).<sup>5-8</sup> By comparison, most previously described MRI pipelines have reported  
351 average ML-TP distances larger than those reported in most dissection studies,<sup>10</sup> implying that their clinical use  
352 may underestimate the risk of partial blindness associated with temporal lobectomy. For HCP-M60 and HCP-S,  
353 median scan-rescan of reproducibility of nML-TP distances was 1mm, though in ~25% of cases was greater than  
354 2mm, implying that it is prudent to artificially enlarge these delineations before providing them for clinical use.  
355 Our informal testing (not presented here) has suggested that the non-deterministic registration steps account  
356 for much of this variability, suggesting alternative registration algorithms may improve CONSULT's  
357 reproducibility.

### 358 5.1 Clinical Accessibility

359 To achieve maximal clinical utility, an imaging tool that delineates the optic radiation needs to minimise its  
360 dependency on manual input, training, and special sequences/hardware. Manual input can be a high barrier to  
361 clinical adoption as it is time consuming, requires training, and interrupts existing clinical workflows. CONSULT  
362 is not the first pipeline published with automated components; most recently-described pipelines contain some  
363 degree of automation. For example, Kammen et al<sup>23</sup> and Clatworthy et al<sup>14</sup> both automated ROI placement, but  
364 also both required that supplied diffusion and structural images were already preprocessed, skull-stripped, and  
365 aligned to one another: steps that often require manual adjustment and quality control to ensure adequate  
366 performance. Other works have presumably automated several of these steps, but still required manual ROI  
367 placement. By contrast, CONSULT can process raw images without need for human input at any stage of the  
368 process and, as discussed below, has demonstrated an ability to process data acquired with a range of  
369 parameters and hardware.

370 Presentation is also important: visualising streamlines or streamline density images requires  
371 meaningful experience because streamline density does not strictly represent tissue density.<sup>14</sup> As discussed in a  
372 previous publication,<sup>38</sup> CONSULT's conversion of streamlines into a binary map for visualisation may be  
373 beneficial for clinical decision making because it allows the boundaries to be defined mathematically rather than  
374 intuitively. This approach also allows results to be converted into DICOM format for viewing in standard clinical  
375 PACS-enabled viewers, minimising disruption to existing clinical workflows. Commendably, some earlier works  
376 converted tractography into binary maps,<sup>14,15</sup> though tractography bootstrapping (applied here) carries the  
377 advantage of producing maps with better-quantified reproducibility.<sup>38</sup>

## 378 5.2 Simple versus Advanced Sequences

379 Some previous works have suggested that high b-value ( $b=5000 \text{ s/mm}^2$ ) multishell sequences may be required  
380 to achieve a reasonable delineation of the optic radiation,<sup>10</sup> and even if simpler acquisitions were sufficient, that  
381 there is no implication that standard tracking algorithms know how to propagate through the crossing regions  
382 of the optic radiation.<sup>21</sup> Similarly, others have suggested that reasonable delineations require specialised track-  
383 filtering algorithms or thresholding techniques tuned to specific sequence/hardware combinations.<sup>14,17,18</sup> If true,  
384 such suggestions would add significant barriers to achieving reliable delineations for most hospitals. Although  
385 probably beneficial, we found no evidence that such advances are absolutely required. Specifically, beyond a  
386 few efficiency boosting techniques, we were able to achieve plausible delineations using standard tractography  
387 algorithms, filtered by simply thresholding the resulting streamline density image without sequence-specific  
388 parameter tuning.<sup>38</sup> More importantly, although we did not have an acquisition with a  $b=5000 \text{ s/mm}^2$  shell for  
389 a direct comparison, we were able to produce such delineations using a variety of acquisitions collected on four  
390 scanners, including readily-accessible single-shell images. We recommend that multishell, or higher spatial  
391 resolution, images are used where possible, partially because of the slight differences observed between our  
392 HCP-M90 and HCP-S results and partially because a higher degree of directional redundancy from longer  
393 acquisitions affords some protection against motion artefacts. However, high resolution multishell images are  
394 clearly not a *requirement* because the anterior extent of Meyer's loop, a variable but clinically-important  
395 measure for planning temporal lobectomies, differed only slightly between all of the tested acquisitions (Figure  
396 6), and the reproducibility of this measure did not significantly differ between lower-resolution single-shell and  
397 high-resolution multishell acquisitions. Of course, most data here was acquired on scanners with good diffusion-  
398 gradient capabilities but, as stated in Section 3, several of these sequences can still be acquired on scanners with  
399 lower capabilities in clinically reasonable time frames. It is noteworthy that the Hospital-C scans were acquired  
400 on a scanner with poorer MR capabilities than most clinical scanners.

401 Despite estimating similar anterior extents, the lower resolution sequences produced broader  
402 delineations of the anterior loop than the lower resolution images despite tractography. This can be expected  
403 as result of more limited boundary information. Of course, in a surgical context where safety is paramount,  
404 labelling the entire Meyer's Loop is more important than eliminating false-positive streamlines and so a mildly  
405 higher volume for these low-resolution sequences should not be considered a major drawback.

## 406 5.3 Limitations

407 One potential criticism of our work is that, like many others, we focussed on achieving a reasonable and reliable  
408 delineation of Meyer's loop, but focussed less on quantitatively validating the middle and posterior sections of  
409 the optic radiation. This focus was because our motivation was surgery-specific: unlike the optic radiation's  
410 posterior and middle sections, Meyer's loop is more typically at risk from common neurosurgical operations that  
411 typically remove large amounts of the middle temporal lobe. The appropriate posterior extent of these incisions  
412 can be directly informed by the ML-TP distance, which requires specialised imaging techniques such as diffusion  
413 MRI. By contrast, as detailed in the Introduction, the medial and posterior sections of the optic radiation can be  
414 somewhat identified by more rudimentary means. Furthermore, demonstrating plausible Meyer's Loop

415 delineations in predominantly healthy individuals is a reasonable validation for planning temporal lobectomies  
416 because patients with epilepsy are the typical recipients of such treatments and characteristically have relatively  
417 normal appearing brains. Demonstrations in healthy controls for the posterior optic radiation, however, does  
418 not imply clinical success given that surgery near these areas is more likely to be for malformations that would  
419 cause a pipeline to fail.

420 A related limitation is that, given our datasets, it is not possible to validate our delineations against  
421 ground-truth data such as post-surgical outcomes. Validation in this sense is important for a clinical tool and  
422 ongoing work for our group, though some assurances should come from the average and range of morphological  
423 measurements found here closely matching several dissection studies, a challenge that the imaging community  
424 has only achieved a small number of times.<sup>10,21</sup>

## 425 5.4 Conclusion

426 We have presented a clinically accessible, fully automated pipeline for delineation of the optic radiation. This  
427 pipeline plausibly estimated the anterior extents of Meyer's Loop in a range of hardware + sequence  
428 combinations, including both multishell and single-shell images that can be acquired in clinically acceptable time  
429 frames. We also demonstrated that, excepting some improvements in efficiency, such delineations can be  
430 achieved without resorting to complex streamline-selection criteria or fundamental changes to the way in which  
431 tractography is performed.

432

## 433 5.5 Acknowledgements

434 This research was partially supported by an Advance Queensland Research Fellowship (R-09964-01), as well as  
435 the Spanish DPI2017-87743-R grant from the Ministerio de Economía, Industria y Competitividad of Spain. The  
436 authors gratefully acknowledge the support of NVIDIA Corporation with their donation of the TITAN X GPU used  
437 in this research, as well as Irene Pulido, Magí Andorrà Inglés, and other staff involved with subject enrolment  
438 and acquisition at HIRF and Hospital Clinic. Data were provided in part by the Human Connectome Project, WU-  
439 Minn Consortium (Principal Investigators: David Van Essen and Kamil Ugurbil; 1U54MH091657) funded by the  
440 16 NIH Institutes and Centers that support the NIH Blueprint for Neuroscience Research; and by the McDonnell  
441 Center for Systems Neuroscience at Washington University.

442

## 443 6 References

- 444 1. Peuskens, D. *et al.* Anatomy of the anterior temporal lobe and the frontotemporal region demonstrated  
445 by fiber dissection. *Neurosurgery* **55**, 1174–1183 (2004).
- 446 2. Alvarez, I., Schwarzkopf, D. S. & Clark, C. A. Extrastriate projections in human optic radiation revealed by  
447 fMRI-informed tractography. *Brain Struct. Funct.* **220**, 2519–2532 (2015).
- 448 3. Winston, G. P. Epilepsy surgery, vision, and driving: what has surgery taught us and could modern  
449 imaging reduce the risk of visual deficits? *Epilepsia* **54**, 1877–88 (2013).
- 450 4. Pathak-Ray, V., Ray, A., Walters, R. & Hatfield, R. Detection of visual field defects in patients after

- 451 anterior temporal lobectomy for mesial temporal sclerosis-establishing eligibility to drive. *Eye (Lond)*.  
452 **16**, 744–8 (2002).
- 453 5. Ebeling, U. & Reulen, H. J. Neurosurgical topography of the optic radiation in the temporal lobe. *Acta*  
454 *Neurochir. (Wien)*. **92**, 29–36 (1988).
- 455 6. Rubino, P. A., Rhoton, A. L., Tong, X. & De Oliveira, E. Three-dimensional relationships of the optic  
456 radiation. *Neurosurgery* **57**, 219–227 (2005).
- 457 7. Choi, C., Rubino, P. A., Fernandez-Miranda, J. C., Abe, H. & Rhoton, A. L. Meyer’s loop and the optic  
458 radiations in the transsylvian approach to the mediobasal temporal lobe. *Neurosurgery* **59**, ONS228-35;  
459 discussion ONS235-6 (2006).
- 460 8. Chowdhury, F. H. & Khan, A. H. Anterior & lateral extension of optic radiation & safety of  
461 amygdalohippocampectomy through middle temporal gyrus: a cadaveric study of 11 cerebral  
462 hemispheres. *Asian J. Neurosurg.* **5**, 78–82 (2010).
- 463 9. Párraga, R. G., Ribas, G. C., Welling, L. C., Alves, R. V. & De Oliveira, E. Microsurgical anatomy of the optic  
464 radiation and related fibers in 3-dimensional images. *Neurosurgery* **71**, 160–172 (2012).
- 465 10. Chamberland, M., Tax, C. M. W. & Jones, D. K. Meyer’s loop tractography for image-guided surgery  
466 depends on imaging protocol and hardware. *NeuroImage Clin.* **20**, 458–465 (2018).
- 467 11. James, J. S. *et al.* Diffusion tensor imaging tractography of Meyer’s loop in planning resective surgery for  
468 drug-resistant temporal lobe epilepsy. *Epilepsy Res.* **110**, 95–104 (2015).
- 469 12. Dreessen de Gervai, P. *et al.* Tractography of Meyer’s Loop asymmetries. *Epilepsy Res.* **108**, 872–882  
470 (2014).
- 471 13. Nilsson, D. *et al.* Intersubject variability in the anterior extent of the optic radiation assessed by  
472 tractography. *Epilepsy Res.* **77**, 11–6 (2007).
- 473 14. Clatworthy, P. L. *et al.* Probabilistic tractography of the optic radiations—An automated method and  
474 anatomical validation. *Neuroimage* **49**, 2001–2012 (2010).
- 475 15. Martínez-Heras, E. *et al.* Improved Framework for Tractography Reconstruction of the Optic Radiation.  
476 *PLoS One* **10**, e0137064 (2015).
- 477 16. Sherbondy, A. J., Dougherty, R. F., Napel, S. & Wandell, B. A. Identifying the human optic radiation using  
478 diffusion imaging and fiber tractography. *J. Vis.* **8**, 12.1–11 (2008).
- 479 17. Tax, C. M. W. *et al.* Evaluating contextual processing in diffusion MRI: application to optic radiation  
480 reconstruction for epilepsy surgery. *PLoS One* **9**, e101524 (2014).
- 481 18. Meesters, S. *et al.* Stability metrics for optic radiation tractography: Towards damage prediction after  
482 resective surgery. *J. Neurosci. Methods* **288**, 34–44 (2017).
- 483 19. Lilja, Y. *et al.* Visualizing Meyer’s loop: A comparison of deterministic and probabilistic tractography.  
484 *Epilepsy Res.* **108**, 481–490 (2014).
- 485 20. Yogarajah, M. *et al.* Defining Meyer’s loop-temporal lobe resections, visual field deficits and diffusion  
486 tensor tractography. *Brain* **132**, 1656–68 (2009).
- 487 21. Chamberland, M. *et al.* Active delineation of Meyer’s loop using oriented priors through MAGNETic  
488 tractography (MAGNET). *Hum. Brain Mapp.* **38**, 509–527 (2017).

- 489 22. Yamamoto, T., Yamada, K., Nishimura, T. & Kinoshita, S. Tractography to Depict Three Layers of Visual  
490 Field Trajectories to the Calcarine Gyri. *Am. J. Ophthalmol.* **140**, 781-785.e1 (2005).
- 491 23. Kammen, A., Law, M., Tjan, B. S., Toga, A. W. & Shi, Y. Automated retinofugal visual pathway  
492 reconstruction with multi-shell HARDI and FOD-based analysis. *Neuroimage* **125**, 767–779 (2016).
- 493 24. Van Essen, D. C. *et al.* The Human Connectome Project: a data acquisition perspective. *Neuroimage* **62**,  
494 2222–31 (2012).
- 495 25. Glasser, M. F. *et al.* The minimal preprocessing pipelines for the Human Connectome Project.  
496 *Neuroimage* **80**, 105–24 (2013).
- 497 26. Tournier, J. D. *et al.* MRtrix3: A fast, flexible and open software framework for medical image processing  
498 and visualisation. *NeuroImage* **202**, (2019).
- 499 27. Reid, L. B., Cunnington, R., Boyd, R. N. & Rose, S. E. Surface-Based fMRI-Driven Diffusion Tractography in  
500 the Presence of Significant Brain Pathology: A Study Linking Structure and Function in Cerebral Palsy.  
501 *PLoS One* **11**, e0159540 (2016).
- 502 28. Smith, R. E., Tournier, J.-D., Calamante, F. & Connelly, A. Anatomically-constrained tractography:  
503 Improved diffusion MRI streamlines tractography through effective use of anatomical information.  
504 *Neuroimage* **62**, 1924–1938 (2012).
- 505 29. Fonov, V., Evans, A., McKinstry, R., Almlí, C. & Collins, D. Unbiased nonlinear average age-appropriate  
506 brain templates from birth to adulthood. *Neuroimage* **47**, S102 (2009).
- 507 30. Tustison, N. J. *et al.* N4ITK: improved N3 bias correction. *IEEE Trans. Med. Imaging* **29**, 1310–20 (2010).
- 508 31. Isensee, F. *et al.* Automated brain extraction of multisequence MRI using artificial neural networks. *Hum.*  
509 *Brain Mapp.* **40**, 4952–4964 (2019).
- 510 32. Reid, L. B., Gillman, A., Pagnozzi, A. M., Manjón, J. V. & Fripp, J. MRI Denoising and Artefact Removal  
511 Using Self-Organizing Maps for Fast Global Block-Matching. in *Lecture Notes in Computer Science* (eds.  
512 Bai, W. *et al.*) **11075**, 20–27 (2018).
- 513 33. Reid, L. B. & Pagnozzi, A. M. Rapid Training Data Generation for Tissue Segmentation Using Global  
514 Approximate Block-Matching with Self-organizing Maps. in *Lecture Notes in Computer Science* (eds.  
515 Stoyanov, D. *et al.*) **11045**, 110–118 (Springer International Publishing, 2018).
- 516 34. Schwarz, C. G. *et al.* Improved DTI registration allows voxel-based analysis that outperforms tract-based  
517 spatial statistics. *Neuroimage* **94**, 65–78 (2014).
- 518 35. Pannek, K., Guzzetta, A., Colditz, P. B. & Rose, S. E. Diffusion MRI of the neonate brain: acquisition,  
519 processing and analysis techniques. *Pediatr. Radiol.* **42**, 1169–82 (2012).
- 520 36. Jenkinson, M., Pechaud, M. & Smith, S. BET2 - MR-based estimation of brain, skull and scalp surfaces. in  
521 *Eleventh Annual Meeting of the Organization for Human Brain Mapping* **17**, 167 (2005).
- 522 37. Dhollander, T., Raffelt, D. & Connelly, A. Unsupervised 3-tissue response function estimation from single-  
523 shell or multi-shell diffusion MR data without a co-registered T1 image. in *ISMRM Workshop on Breaking*  
524 *the Barriers of Diffusion MRI* **5** (2016).
- 525 38. Reid, L. B., Cespedes, M. I. & Pannek, K. How many streamlines are required for reliable probabilistic  
526 tractography? Solutions for microstructural measurements and neurosurgical planning. *Neuroimage*

527            **211**, 116646 (2020).

528    39.    Ronneberger, O., Fischer, P. & Brox, T. U-Net: Convolutional Networks for Biomedical Image  
529            Segmentation. in *Medical Image Computing and Computer-Assisted Intervention -- MICCAI 2015* (eds.  
530            Navab, N., Hornegger, J., Wells, W. M. & Frangi, A. F.) 234–241 (Springer International Publishing, 2015).

531

532



## 533 7 Supplementary Materials

### 534 7.1 Discussion on novel MRtrix Features

#### 535 7.1.1 Voxel-wise Seeding Direction

536 Region-to-region tractography usually is executed by seeding from one ROI and keeping streamlines that arrive  
537 in a second ROI, which results in two forms of inefficiency. Firstly, with unidirectional seeding, at least half of all  
538 streamlines will travel the wrong direction from the seed. Bi-directional seeding does not prevent this but rather  
539 enforces it, causing streamlines to no longer begin in the desired ROI. Secondly, when seeding from a region  
540 containing more than one fibre population, streamlines may follow completely unrelated anatomy and so either  
541 become rejected, or by chance find the end region and be erroneously included in the final tractogram. Although  
542 the current implementation of MRtrix3 allows an initial tracking direction to be set, this is a single vector that is  
543 identically applied to all voxels, and so is not suitable for seeding from a curved surface (e.g. a gyrus) or from a  
544 region of fanning fibres (e.g. the LGN).

545 By seeding from a unipolar voxel image (i.e. where each voxel contains a histogram of unipolar-direction  
546 probabilities) time is not spent seeding in directions that are unlikely to produce rejected streamlines. This also  
547 affords the advantages previously provided by surface (mesh) based seeding.<sup>27</sup>

#### 548 7.1.2 Ordered Include Regions

549 Tractography between ROIs often utilises ‘include’ regions which must all be passed through for a streamline to  
550 be retained. Although very useful, the order these are passed through is not enforced, which can lead to  
551 erroneous inclusion of some streamlines. For example, when delineating the corticospinal tract, it is common  
552 for streamlines to leave the cortex, cross hemispheres, contact the brainstem, and travel superiorly to the  
553 original side’s internal capsule mask. These issues are often solvable with additional exclude regions, but their  
554 placement adds time and effort, and suitable locations often require trial and error, particularly in participants  
555 with pathology. For delineating the optic radiation, it is also common for streamlines to pass from the LGN to  
556 the temporal pole, then return to the LGN before passing to the primary visual cortex via the posterior bundle.  
557 We have added “ordered include” regions to the current options in tckgen to circumvent these issues.

#### 558 7.1.3 Explicit Backtracking

559 In regions where fibres branch, it is common for streamlines to follow the wrong anatomy and ultimately be  
560 excluded from analyses. This inevitable consequence of probabilistic tractography is wasteful in that the section  
561 before the branch may be accurate but this poor branching behaviour sees the entire streamline rejected.  
562 Anatomically constrained tractography, an established method within MRtrix, can rewind streamlines when they  
563 terminate unsatisfactorily, allowing a re-attempt at completing. We have enabled ‘back-tracking’ within MRtrix  
564 for more general use by allowing this to run outside of anatomically constrained tractography, and requiring  
565 rewinding to explicitly defined inclusion ROIs that can be placed before problematic branch points. In the present  
566 study the maximum number of back-track attempts per streamline was conservatively set at two.

567 We have informally tested CONSULT without use of back-tracking. Without this feature, tractography  
568 typically produces virtually identical delineations, but in some instances can take 2 – 3 times as long to complete.  
569 This is particularly prevalent when pathology is present.

570

## 571 7.2 The Optic Radiation as Visible on Structural Images

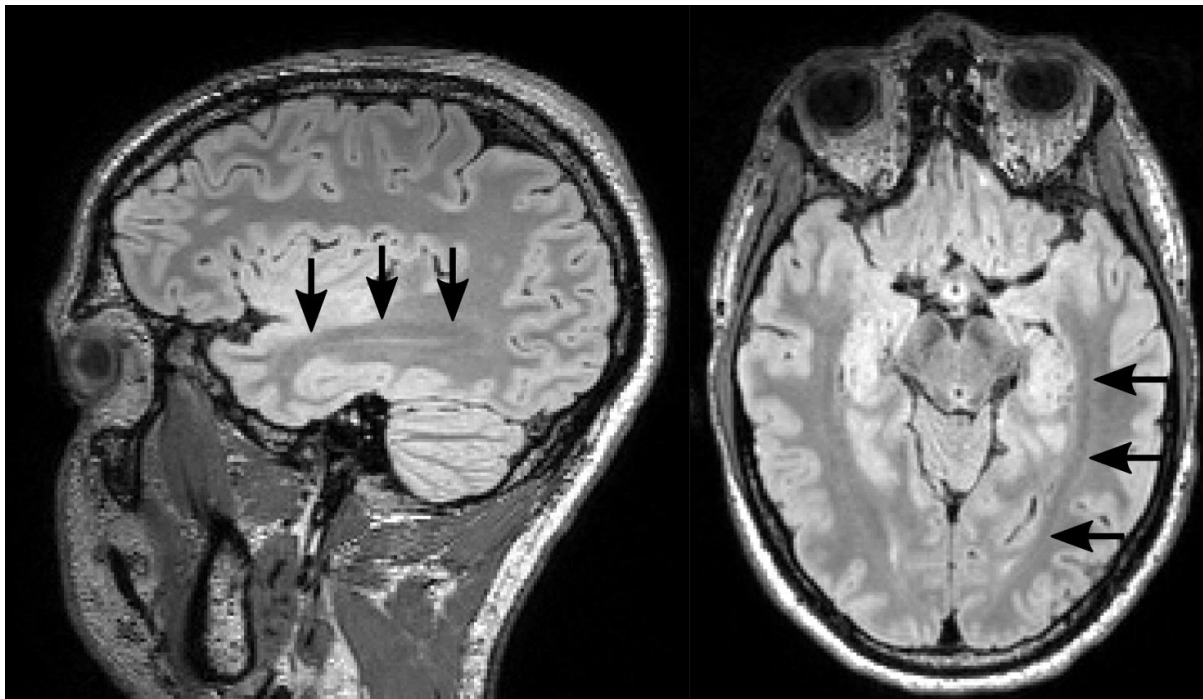

572

573 *Suppl Fig 1. A raw FLAIR image of a neurosurgical patient. Much of the middle and posterior optic radiation (arrows) is visible*  
574 *as a band.*

575

## 576 7.3 Optic Nerve Identifying Convolutional Neural Network

577 The optic chiasm is typically visible on fractional anisotropy (FA) images, providing a potential seeding point for  
578 tractography to identify the LGN or posterior bundle of the optic radiation. In unpublished analyses, we have  
579 previously identified a seeding point by transforming an approximate optic-chiasm region from MNI space,  
580 multiplying this by the upsampled FA image, thresholding at 0.3, and binarizing the result. In our experience,  
581 this method works on a variety of datasets, but skull stripping at times can remove the optic chiasm and the  
582 Hospital-A dataset presented here contained an artefact localised to this region in several instances, limiting the  
583 utility of this method. To overcome this, for all datasets in this study, we instead seeded from the optic tract  
584 near the brainstem.

585 To identify the optic tract, we trained a convolutional neural network. This network accepted T1 and  
586 white matter fibre orientation dispersion images from a single participant, after a preprocessing stage affine  
587 registered these to MNI space (1mm isotropic) and cropped them to six axial slices in the centre of the brain.  
588 The output was a binary mask of the optic tract as it entered both cerebral hemispheres, which could then be  
589 padded and transformed back into native participant space.

590 A 3D Unet-style architecture<sup>39</sup> was used, implemented in Keras using Tensorflow 1.15 (see Suppl Fig 2).  
591 Four encoding levels were used, each containing two batch normalisation and convolutional layers, and one  
592 dropout layer, with dropout set to 50%. Pooling was performed using strided convolutions of the first  
593 convolutional layer in each encoding layer to allow the network to learn the optimal means by which to select  
594 features. Four decoding layers each consisted of two batch normalisation and convolutional layers with a custom  
595 written tri-linear interpolation resizing layer. As with traditional Unet architectures, input into each decoding  
596 layer included the linearly upsampled output of the previous decoding layer, concatenated with the output of  
597 the corresponding encoding layer. ReLu activation functions were used for all convolutional layers, excepting  
598 the final layer, which was softmax.

599 Training (n=98), testing (n=20), and validation (n=40) datasets were derived from the participants who  
600 were used to generate probabilistic images of the temporal lobe and V1/V2 (see main text). Ground truth images  
601 were binarised trackmaps generated by seeding from the optic chiasm by the means described earlier, using the  
602 Dice coefficient for the loss function. To reduce the probability of over-fitting input images were augmented on  
603 the fly using a combination of smoothing, Gaussian noise addition, channel drop-out, left-right flipping and semi-  
604 random non-linear geometric distortions. Once trained, the mean Dice coefficients for the validation and test  
605 datasets were each ~0.95. Of the 500 HCP-M90 participants for whom the optic radiation was delineated, 54  
606 also appeared in this training set. No participants included in other datasets contributed to the training, test, or  
607 validation datasets.

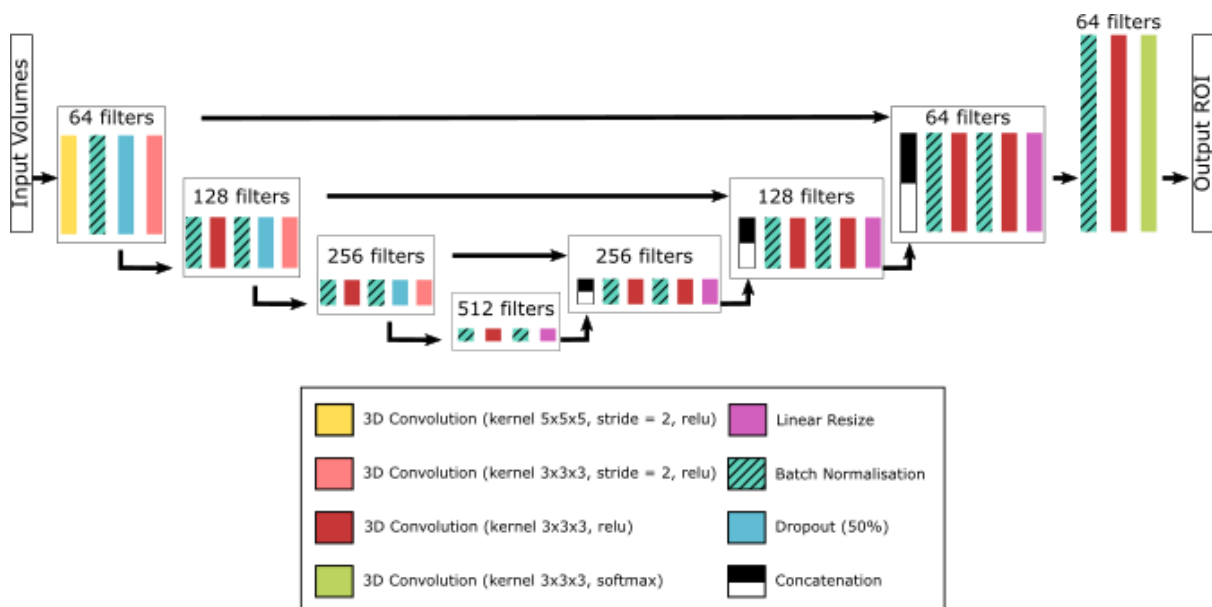

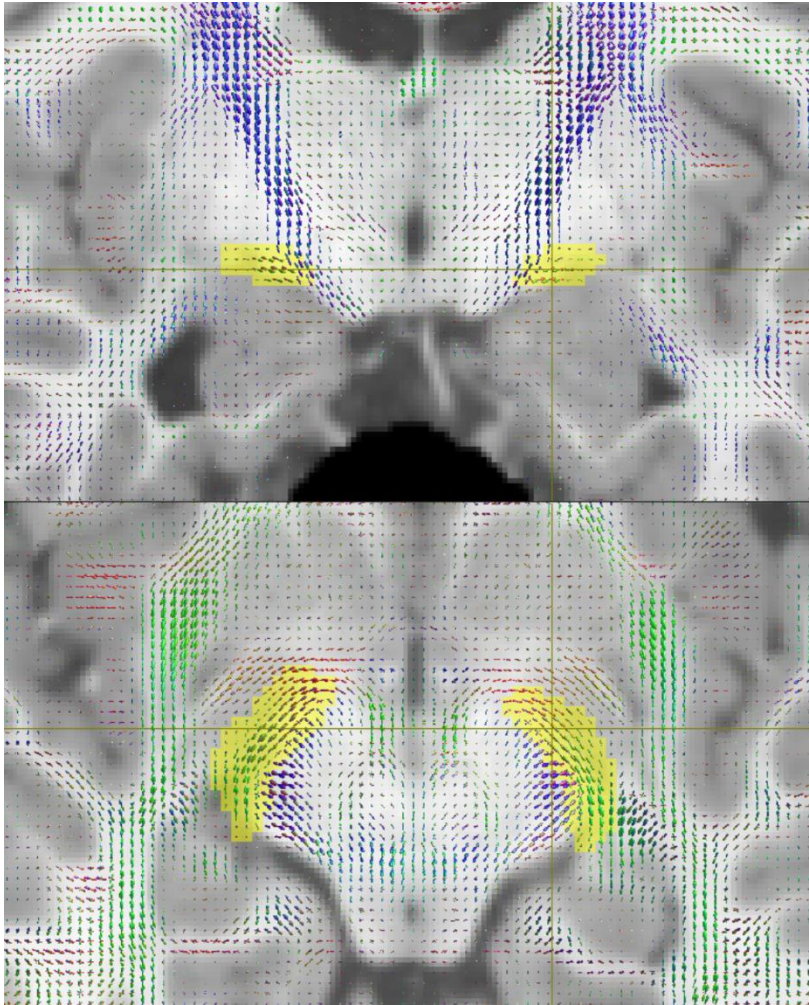

611

612 *Suppl Fig 3. Example of seeding areas (yellow) for the optic radiation at the level of the brainstem, generated using a*  
613 *convolutional neural network. The background image is a T1 MPRAGE (grey) with coloured fibre orientation distributions*  
614 *overlaid, both of which were fed into the network.*

615

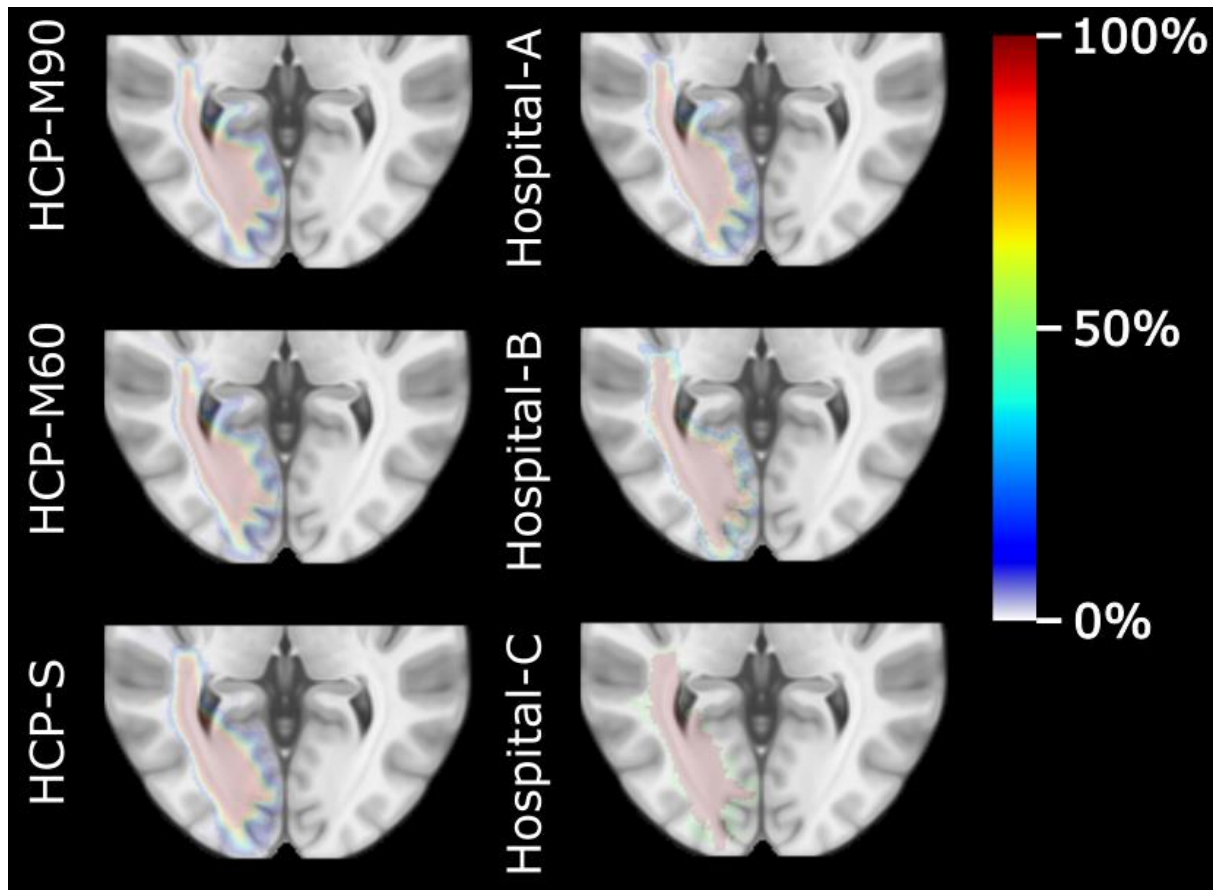

Suppl Fig 4. Population tractography 'heat map' (displayed as a percentage of participants) overlaid on an MPRAGE MNI template. The border of the middle and posterior optic radiation is visible as a dark line on the MPRAGE image. Tractography using CONSULT typically bordered close to this line, with tighter delineations for acquisitions with higher spatial and angular resolution.
